# Supplementary material for: Single Cell RNA Sequencing Analysis of Mouse Retina Identifies a Subpopulation of Muller Glia Involved in Retinal Recovery From Injury in the FCD-LIRD Model
Source: PubMed Central journal article supplement — Invest Ophthalmol Vis Sci. 2023 Aug 1;64(11):2. doi: 10.1167/iovs.64.11.2 (PMC10399600; doi:10.1167/iovs.64.11.2), 2023-08-01
Supplement: iovs-64-11-2_s001.pdf [file iovs-64-11-2_s001.pdf]

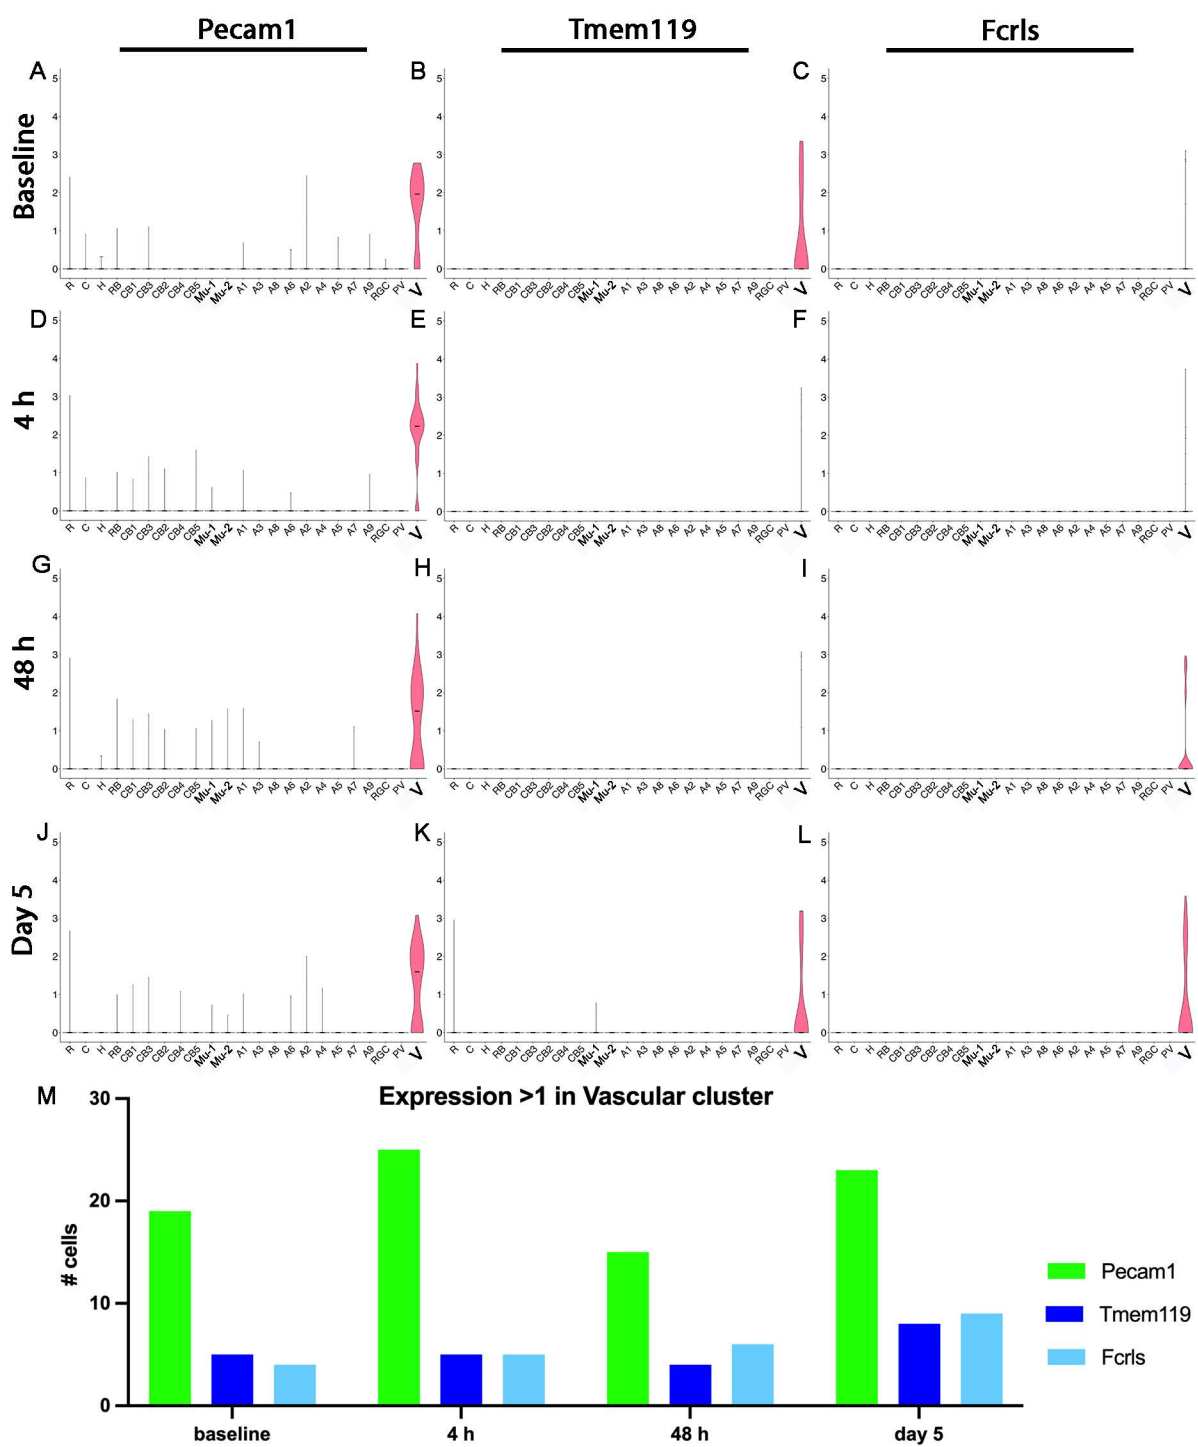

**Fig. S1**

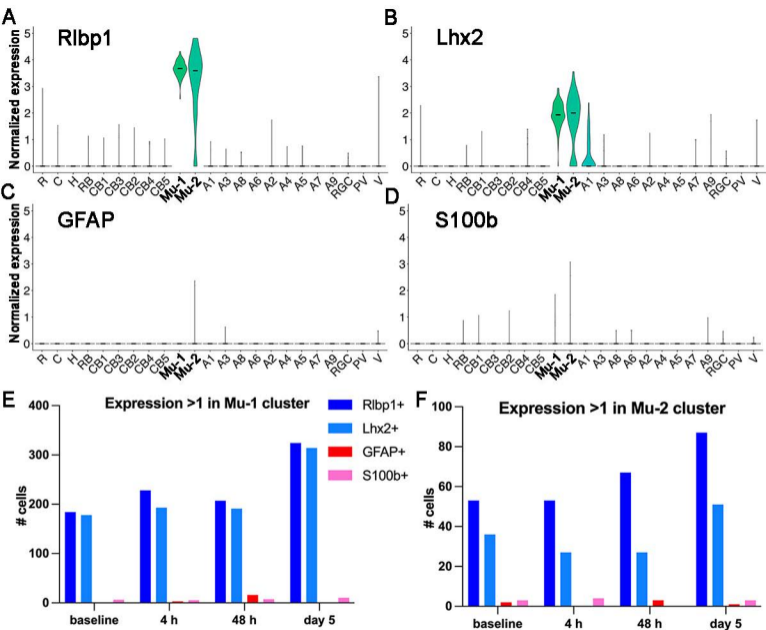

Fig. S2

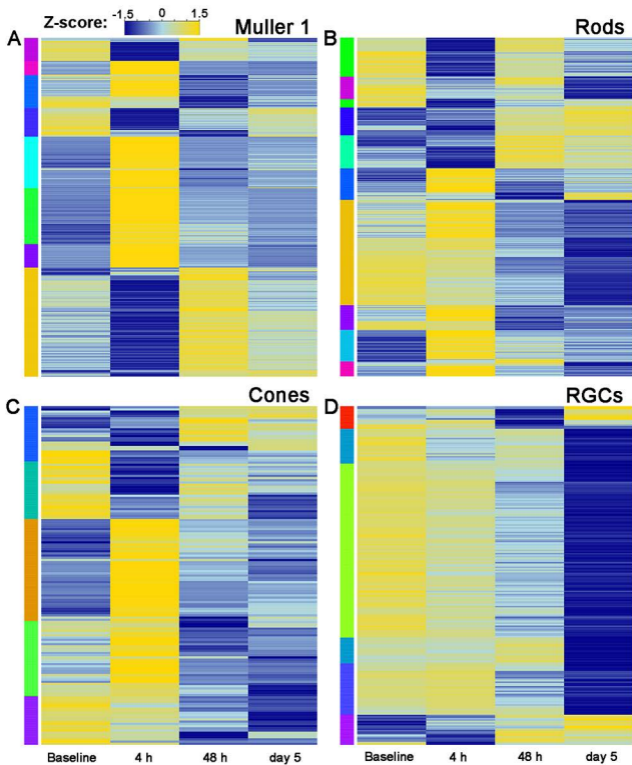

**Fig. S3**

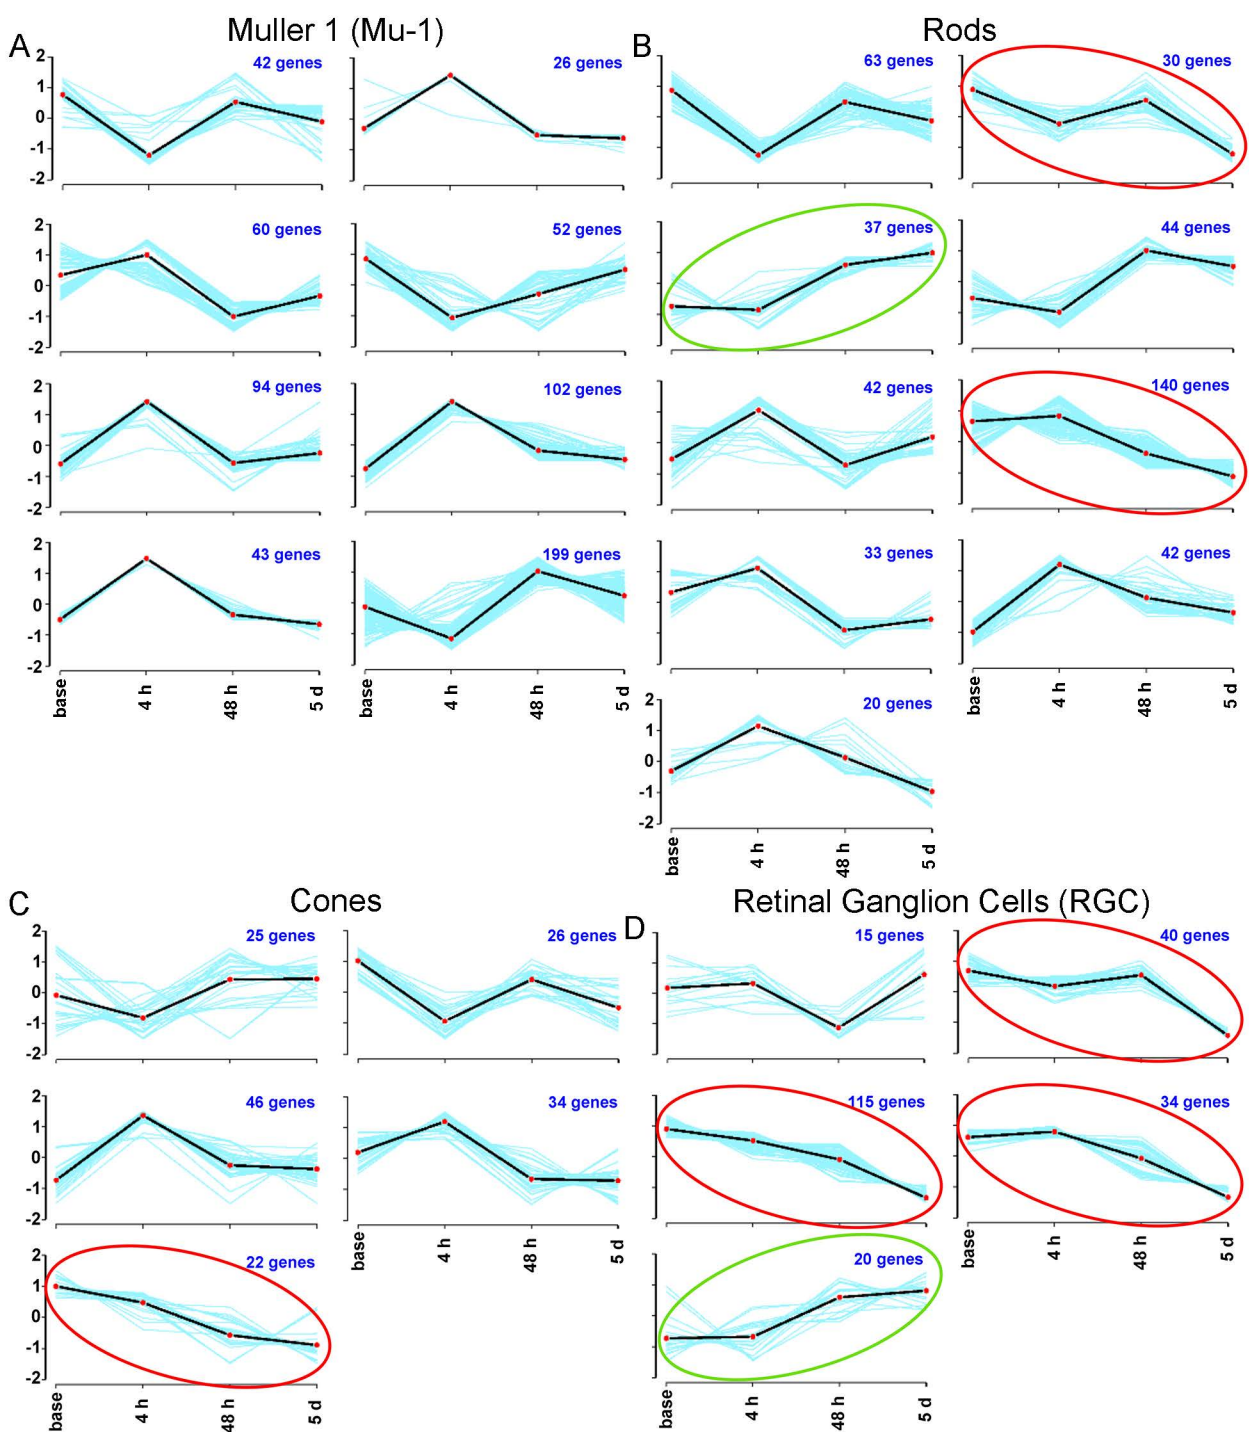

**Fig. S4**

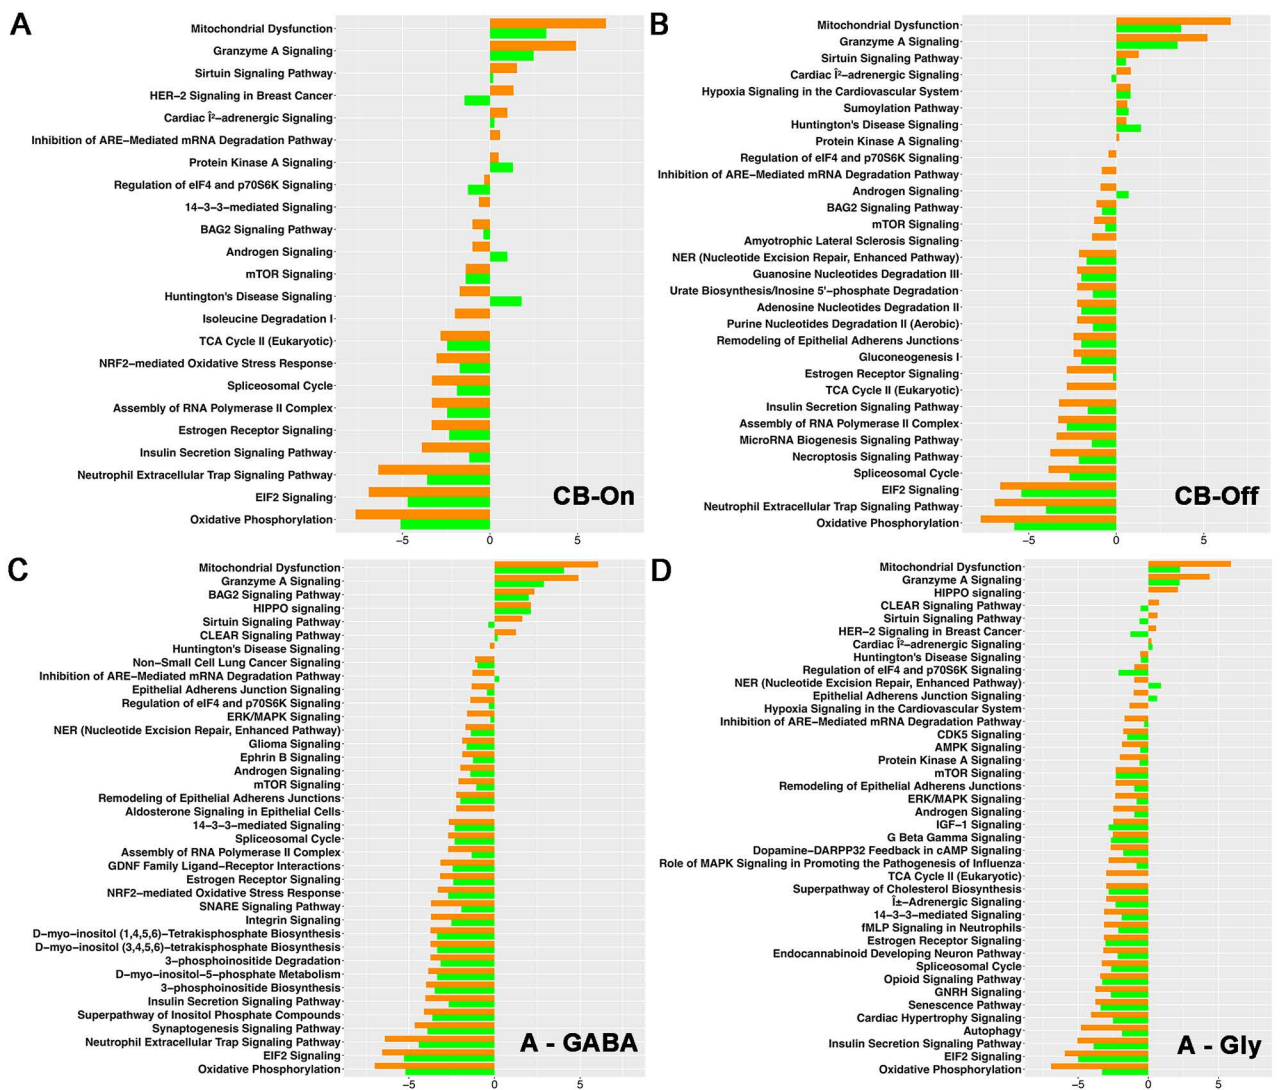

**Fig. S5**

Inferior Retina

Superior Retina

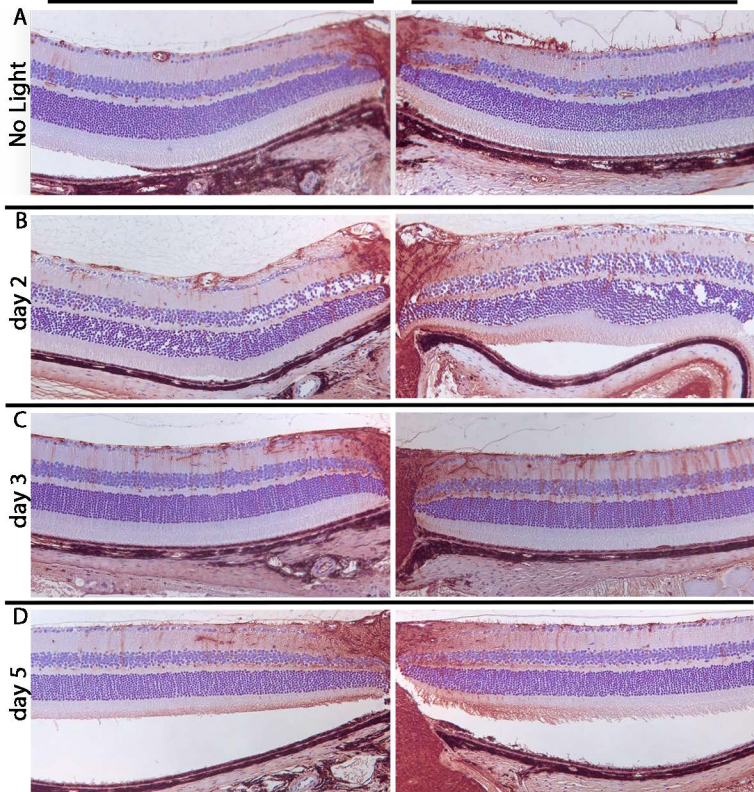

Fig. S6



# Synaptogenesis Signaling Pathway

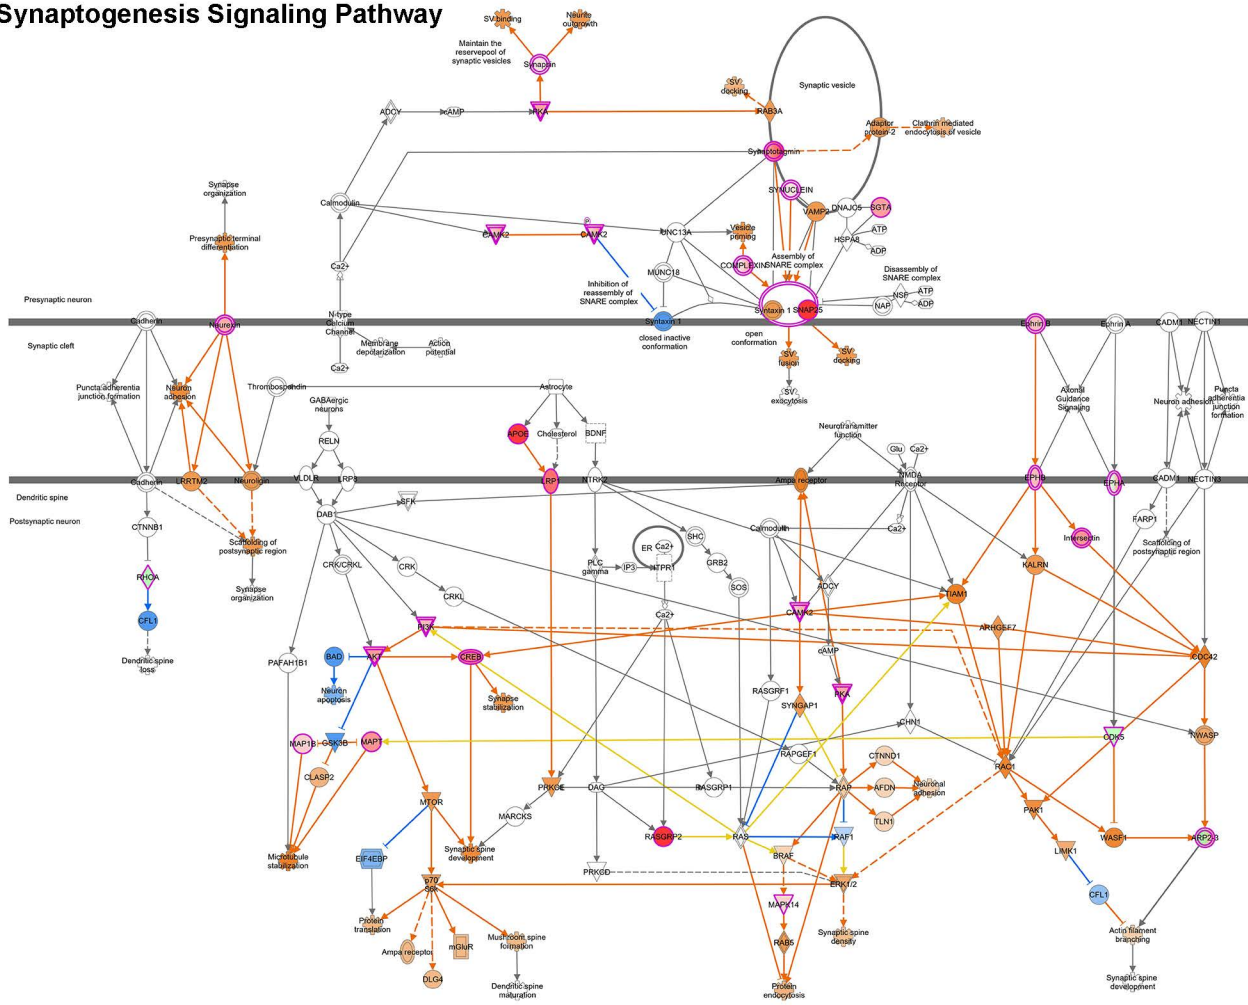

Fig. S7





# Reelin Signaling in Neurons Pathway

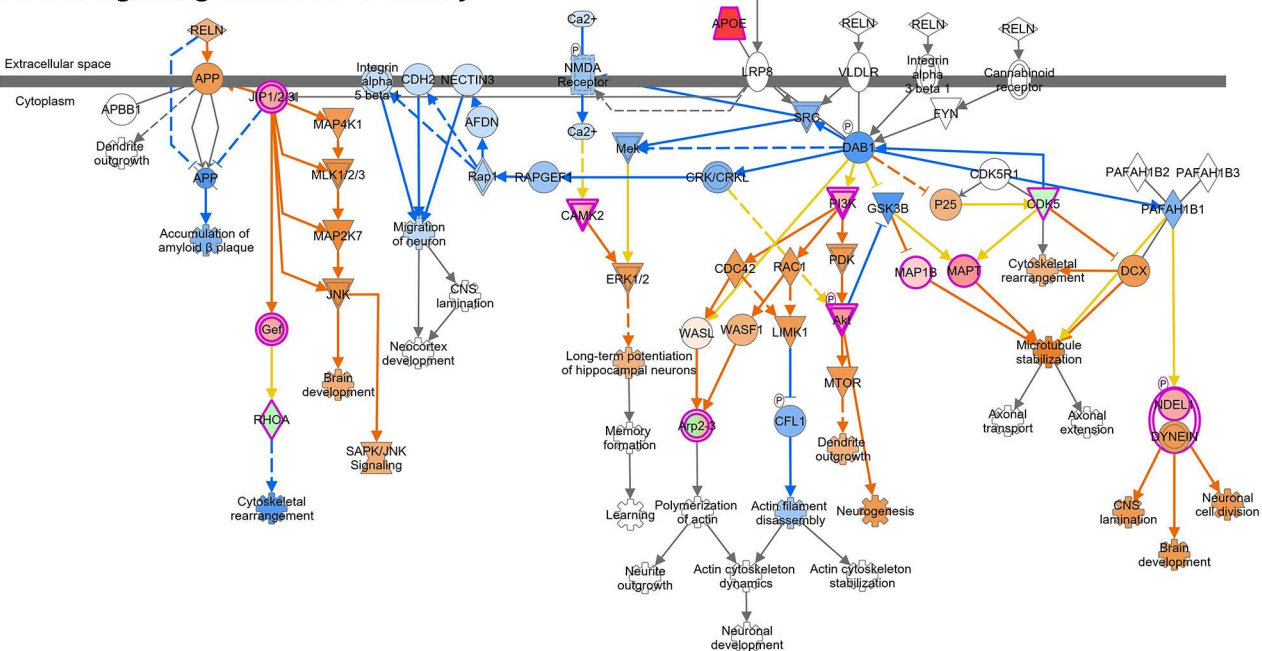

Fig. S9

## Supplemental Figure Legends

**Supplemental Figure S1. Very few microglia cells were identified in mouse retina and were included within the vascular endothelial cluster.** A-L) Violin plots show that there is little to no expression of microglia markers Tmem119 (B, E, H, K) and Fcrls (C, F, I, L) as compared to the vascular marker Pecam1 (A, D, G, J) at the 4 time points. M) The number of cells with normalized expression greater than 1 for the vascular marker Pecam1 (green bars), and microglia specific markers (Tmem119, dark blue and Fcrls, light blue) are shown.

**Supplemental Figure S2. Very few astrocytes were identified in the mouse retina and were included within the Muller glia cluster.** A-D) Sample violin plots from the baseline timepoint show that there is little to no expression of astrocyte markers GFAP (C) and S100b (D) as compared to Muller glia markers Rlb1 (A) and Lhx2 (B). E-F) Quantification for all timepoints is shown for the M1 cluster (E) and M2 cluster (F); the number of cells with normalized expression greater than 1 for the Muller glia markers Rlb1 (dark blue bars) and Lhx2 (light blue bars) compared to the astrocyte markers GFAP (red bars) and S100b (pink bars) are included.

**Supplemental Figure S3. Heat maps of average gene expression for selected cell types.** The four cell types shown are (A) Muller-1 cells, (B) Rod cells, (C) Cone cells, and (D) RGCs. Genes with statistically significant expression changes ( $FDR < 0.05$ ) between time points are shown at baseline, 4 h, 48 h, and day 5 post light injury.

**Supplemental Figure S4. Different cell types vary in their temporal patterns of gene expression changes.** Spaghetti plot representation of differentially expressed genes grouped by their temporal patterns of expression changes. A) Eight patterns were generated for Muller-1 cells with no clear trend of decrease or increase in the late time point in any cluster. B) Five patterns were generated for cone cells, with one cluster (red oval) showing a clear downward trend at the late time point. C) Nine patterns were generated for rod cells, with one cluster showing an upward trend (green oval) and two clusters showing a downward trend (red ovals). (D) Five patterns were generated for RGCs with one cluster being upregulated (green oval) and three clusters showing a downward trend (red ovals).

**Supplemental Figure S5. IPA results at 48 h and day 5.** Results of IPA for the top up- or down-regulated pathways at 48 h (green bars) and day 5 (orange bars) post light injury are shown as bar plots for selected cell types. Cell types shown are: A) ON-cone bipolar cells (CB-On), B) OFF-cone bipolar cells (CB-Off), C) GABAergic amacrine cells (A. GABA) and D) glycinergic amacrine cells (A. Gly). The top 1500 statistically differentially expressed genes ( $p < 0.05$ ) between 48 h and baseline and between day 5 and baseline were used as input for IPA. Pathways are considered as significantly regulated if they meet a  $p$ -value  $< 0.05$  and  $|Z\text{-score}| > 2.0$ .

**Supplemental Figure S6. GFAP Immunohistochemistry of freeze-substitution fixed, paraffin processed retinal sections from mice with and without light injury (FCD-LIRD).** Representative images of GFAP-stained retinal sections showing the inferior (left column) and superior (right column) retina of eyes collected after no light injury (A), 2 days after light injury (B), 3 days after light injury (C) and 5 days after light injury (D). Light injury eyes were subjected to 45 Klux following the 4@3 FCD-LIRD protocol. GFAP positive staining (brown diaminobenzidine-chromogen) is seen as brown streaks following the Muller glia cellular distribution. Minimal staining is seen at baseline (A). Increased staining is seen at day 2 (B) and day (3) followed by a reduction at day 5 (D). Images were taken at 20x magnification on a Leica DM200 microscope.

**Supplemental Figure S7. The *Synaptogenesis signaling pathway* is upregulated in Muller-1 cells at day 5 post light injury.** A schematic representation of the synaptogenesis pathway in Muller-1 cells at day 5 post light injury compared to the baseline. The top 1500 statistically differentially expressed genes ( $p < 0.05$ ) between these two time points were used as input for IPA. The diagram was generated by Ingenuity Pathway Analysis (QIAGEN).

**Supplemental Figure S8. The *Ephrin receptor signaling pathway* is upregulated in Muller-1 cells at day 5 post light injury.** A schematic representation of the Ephrin receptor pathway in Muller-1 cells at day 5 post light injury compared to the baseline. The top 1500 statistically differentially expressed genes ( $p < 0.05$ ) between these two time points were used as input for IPA. The diagram was generated by Ingenuity Pathway Analysis (QIAGEN).

**Supplemental Figure S9. The *Reelin signaling in neurons pathway* is upregulated in Muller-1 cells at day 5 post light injury.** A schematic representation of the Reelin signaling in neurons pathway in Muller-1 cells at day 5 post light injury compared to the baseline. The top 1500 statistically differentially expressed genes ( $p < 0.05$ ) between these two time points were used as input for IPA. The diagram was generated by Ingenuity Pathway Analysis (QIAGEN).
