# Supplementary material for: Single Cell RNA Sequencing Analysis of Mouse Retina Identifies a Subpopulation of Muller Glia Involved in Retinal Recovery From Injury in the FCD-LIRD Model
Source: PubMed Central journal article supplement — Invest Ophthalmol Vis Sci. 2023 Aug 1;64(11):2. doi: 10.1167/iovs.64.11.2 (PMC10399600; doi:10.1167/iovs.64.11.2), 2023-08-01
Supplement: iovs-64-11-2_s003.pdf [file iovs-64-11-2_s003.pdf]

**Supplemental Table S2:** Top 10 significantly enriched GO biological processes (gene set overlaps investigated in GSEA and Molecular Signature Database, FDRq-value <0.05). Genes from selected subclusters from the spaghetti plot showing a pattern of significantly **increased** or **decreased** genes for Rods, Cones, and RGCs were used as input data.

**(A) Rod Photoreceptor:** One subcluster with 37 genes showing significant late **increase** (day 5)

| Pathways / Gene Set Name                                                                         | # Genes in Overlap | p-value              | FDRq-value           |
|--------------------------------------------------------------------------------------------------|--------------------|----------------------|----------------------|
| Homeostatic Process                                                                              | 12                 | 7.75 e <sup>-9</sup> | 4.08 e <sup>-5</sup> |
| Nervous system process                                                                           | 11                 | 3.51 e <sup>-8</sup> | 1.23 e <sup>-4</sup> |
| Establishment of protein localization                                                            | 11                 | 8.81 e <sup>-8</sup> | 1.55 e <sup>-4</sup> |
| Tissue homeostasis                                                                               | 6                  | 8.84 e <sup>-8</sup> | 1.55 e <sup>-4</sup> |
| Cellular Homeostasis                                                                             | 8                  | 2.65 e <sup>-7</sup> | 3.11 e <sup>-4</sup> |
| Regulation of cardiac muscle contraction by regulation of the release of sequestered calcium ion | 3                  | 8.5 e <sup>-7</sup>  | 8.01 e <sup>-4</sup> |
| Microtubule based process                                                                        | 8                  | 1.01 e <sup>-6</sup> | 8.19 e <sup>-4</sup> |
| Sensory perception of light stimulus                                                             | 5                  | 1.28 e <sup>-6</sup> | 9.24 e <sup>-4</sup> |
| Regulation of cardiac muscle contraction by calcium ion signaling                                | 3                  | 1.43 e <sup>-6</sup> | 9.43 e <sup>-4</sup> |
| Regulation of transport                                                                          | 10                 | 1.75 e <sup>-6</sup> | 1.03 e <sup>-3</sup> |

**(B) Rod Photoreceptor:** Two subcluster with 170 genes showing significant late **decrease** (day 5)

| Pathways / Gene Set Name                    | # of Genes in Overlap | p-value                | FDRq-value             |
|---------------------------------------------|-----------------------|------------------------|------------------------|
| Cytoplasmic translation                     | 65                    | 3.95 e <sup>-117</sup> | 3.06 e <sup>-113</sup> |
| Peptide biosynthetic process                | 70                    | 5.03 e <sup>-75</sup>  | 1.95 e <sup>-71</sup>  |
| Amide biosynthetic process                  | 71                    | 6.69 e <sup>-72</sup>  | 1.73 e <sup>-68</sup>  |
| Peptide metabolic process                   | 71                    | 9.36 e <sup>-71</sup>  | 1.82 e <sup>-67</sup>  |
| Organonitrogen biosynthetic process         | 83                    | 3.92 e <sup>-67</sup>  | 6.08 e <sup>-64</sup>  |
| Cellular amide metabolic process            | 72                    | 2.13 e <sup>-64</sup>  | 2.75 e <sup>-61</sup>  |
| Cellular macromolecule biosynthetic process | 70                    | 7.7 e <sup>-62</sup>   | 8.54 e <sup>-59</sup>  |
| Ribosome biogenesis                         | 25                    | 2.95 e <sup>-25</sup>  | 2.86 e <sup>-22</sup>  |
| Ribonucleoprotein complex biogenesis        | 28                    | 3.77 e <sup>-24</sup>  | 3.25 e <sup>-21</sup>  |
| rRNA metabolic process                      | 21                    | 4.33 e <sup>-21</sup>  | 3.36 e <sup>-18</sup>  |

**(C) Cone Photoreceptor:** One subcluster with 22 genes showing significant late **decrease** (day 5)

| Pathways / Gene Set Name                        | # of Genes in Overlap | p-value               | FDRq-value           |
|-------------------------------------------------|-----------------------|-----------------------|----------------------|
| Organonitrogen compound biosynthetic process    | 13                    | 8.54 e <sup>-13</sup> | 6.63 e <sup>-9</sup> |
| ATP biosynthetic process                        | 6                     | 8.54 e <sup>-13</sup> | 6.63 e <sup>-9</sup> |
| Purine containing compound biosynthetic process | 7                     | 4.66 e <sup>-11</sup> | 1.21 e <sup>-7</sup> |
| Nucleoside triphosphate biosynthetic process    | 6                     | 7.76 e <sup>-11</sup> | 1.51 e <sup>-7</sup> |

|                                           |   |                       |                      |
|-------------------------------------------|---|-----------------------|----------------------|
| Oxidative phosphorylation                 | 6 | 1.36 e <sup>-10</sup> | 2.11 e <sup>-7</sup> |
| Nucleoside phosphate biosynthetic process | 7 | 1.86 e <sup>-10</sup> | 2.41 e <sup>-7</sup> |
| Cytoplasmic translation                   | 6 | 2.36 e <sup>-10</sup> | 2.62 e <sup>-7</sup> |
| Proton motive force driven ATP synthesis  | 5 | 4.91 e <sup>-10</sup> | 4.76 e <sup>-7</sup> |
| Ribosomal small subunit biogenesis        | 5 | 5.61 e <sup>-10</sup> | 4.84 e <sup>-7</sup> |
| Aerobic respiration                       | 6 | 7.26 e <sup>-10</sup> | 5.64 e <sup>-7</sup> |
|                                           |   |                       |                      |

**Note:** There was **no** subcluster pattern with significantly **increased** genes in cones.

**(D) Retinal Ganglion Cells (RGCs):** Three subclusters with 189 genes showing significant late **decrease** (day 5)

| Pathways / Gene Set Name                     | # of Genes in Overlap | p-value               | FDRq-value            |
|----------------------------------------------|-----------------------|-----------------------|-----------------------|
| Cytoplasmic translation                      | 57                    | 3.5 e <sup>-94</sup>  | 2.72 e <sup>-90</sup> |
| Organonitrogen compound biosynthetic process | 91                    | 1.62 e <sup>-71</sup> | 6.27 e <sup>-68</sup> |
| Peptide metabolic process                    | 71                    | 8.42 e <sup>-66</sup> | 2.18 e <sup>-62</sup> |
| Peptide biosynthetic process                 | 67                    | 1.28 e <sup>-65</sup> | 2.48 e <sup>-62</sup> |
| Amide biosynthetic process                   | 67                    | 3.34 e <sup>-61</sup> | 5.19 e <sup>-58</sup> |
| Cellular amide metabolic process             | 72                    | 2.04 e <sup>-59</sup> | 2.64 e <sup>-56</sup> |
| Cellular macromolecule biosynthetic process  | 69                    | 9.66 e <sup>-56</sup> | 1.07 e <sup>-52</sup> |
| Oxidative phosphorylation                    | 34                    | 1.82 e <sup>-48</sup> | 1.77 e <sup>-45</sup> |
| Aerobic respiration                          | 34                    | 5.59 e <sup>-44</sup> | 4.82 e <sup>-41</sup> |
| Cellular respiration                         | 35                    | 2.7 e <sup>-42</sup>  | 2.09 e <sup>-39</sup> |

**Note:** One subcluster pattern in RGCs with 20 genes showing significant late **increase** resulted in **no** GO-biological process overlaps.
